# Supplementary material for: Bias-free, solar-charged electric double-layer capacitors
Source: Royal Society of Chemistry journal article supplement (doi:10.1039/c4nr05628k), 2014-01-01
Supplement: c4nr05628k1.pdf [file c4nr05628k1.pdf]

Supporting Information for

**Bias-free, Solar-charged Electric Double-Layer Capacitors**

*Hao Wu,<sup>†</sup> Jing Geng,<sup>†</sup> Yuhang Wang, Yanli Wang, Zheng Peng, Gengfeng Zheng\**

Laboratory of Advanced Materials, Department of Chemistry

Fudan University, Shanghai, 200433, China

\*E-mail: gfzheng@fudan.edu.cn

<sup>†</sup> These authors contributed equally to this work.

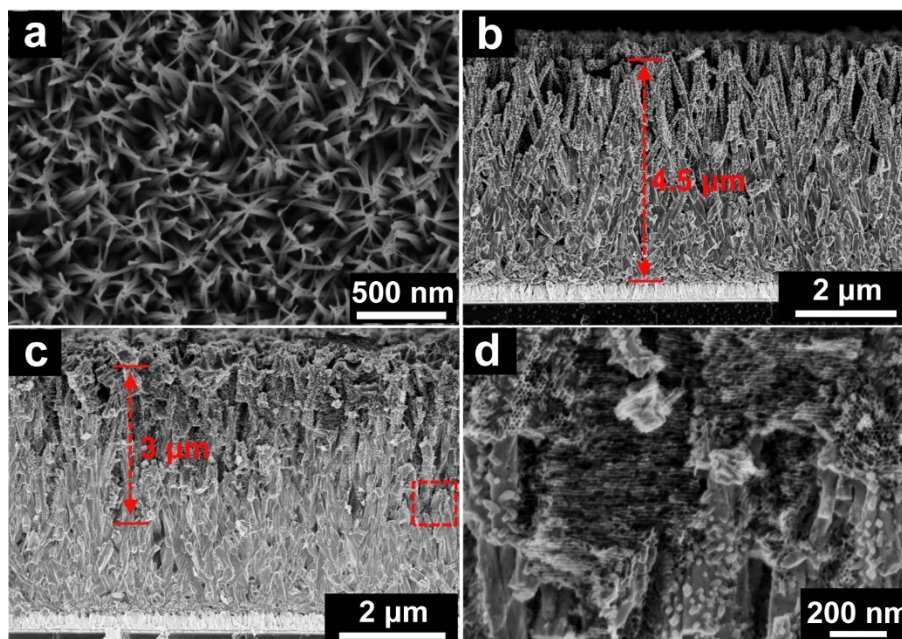

**Fig. S1** (a) Top-view SEM image of  $\text{TiO}_2$  nanowire arrays. (b, c) Side-view SEM image of (b) branched  $\text{TiO}_2$  and (c) branched  $\text{TiO}_2/\text{meso-C}$  hybrid structures, respectively. (d) Magnified view of the red dotted box in (c).

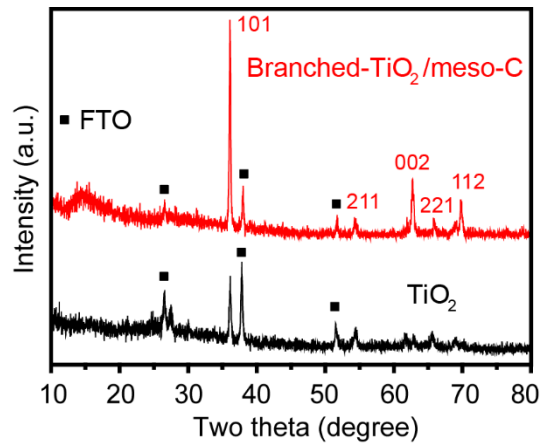

**Fig. S2** XRD patterns of the branched- $\text{TiO}_2$  (black curve) and the branched- $\text{TiO}_2/\text{meso-C}$  (red curve) hybrid structures. Black squares represent the peaks of fluorine-doped tin oxide (FTO) substrate.

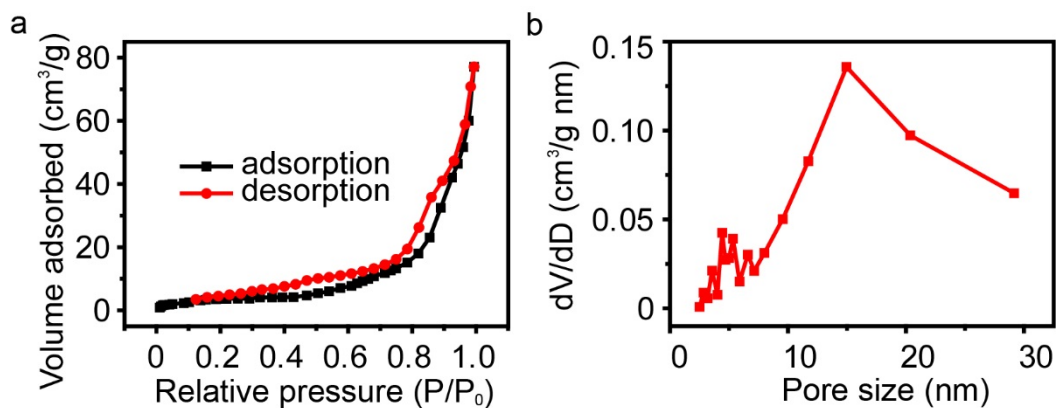

**Fig. S3** (a) N<sub>2</sub> sorption isotherms of the branched-TiO<sub>2</sub>/meso-C hybrid structures. (b) Pore distribution calculated from the desorption branch.

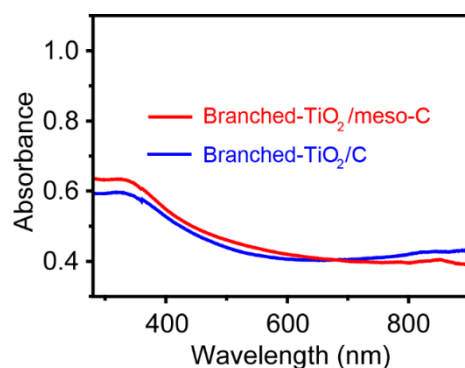

**Fig. S4** UV-Vis absorption spectra of the branched-TiO<sub>2</sub>/C (blue curve) and branched-TiO<sub>2</sub>/meso-C (red curve) hybrid structures.

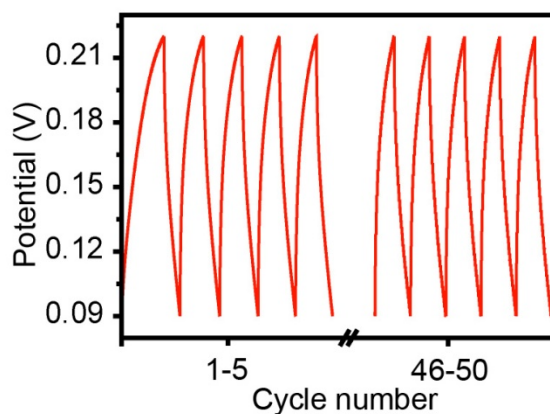

**Fig. S5** Charge-discharge curves of the branched-TiO<sub>2</sub>/meso-C hybrid structure at a current density of 0.1 A/g without light irradiation.
